# Supplementary material
Source: PubMed Central journal article supplement (PMC8203467)
Supplement: jci-131-145800-s008.pdf [file jci-131-145800-s008.pdf]

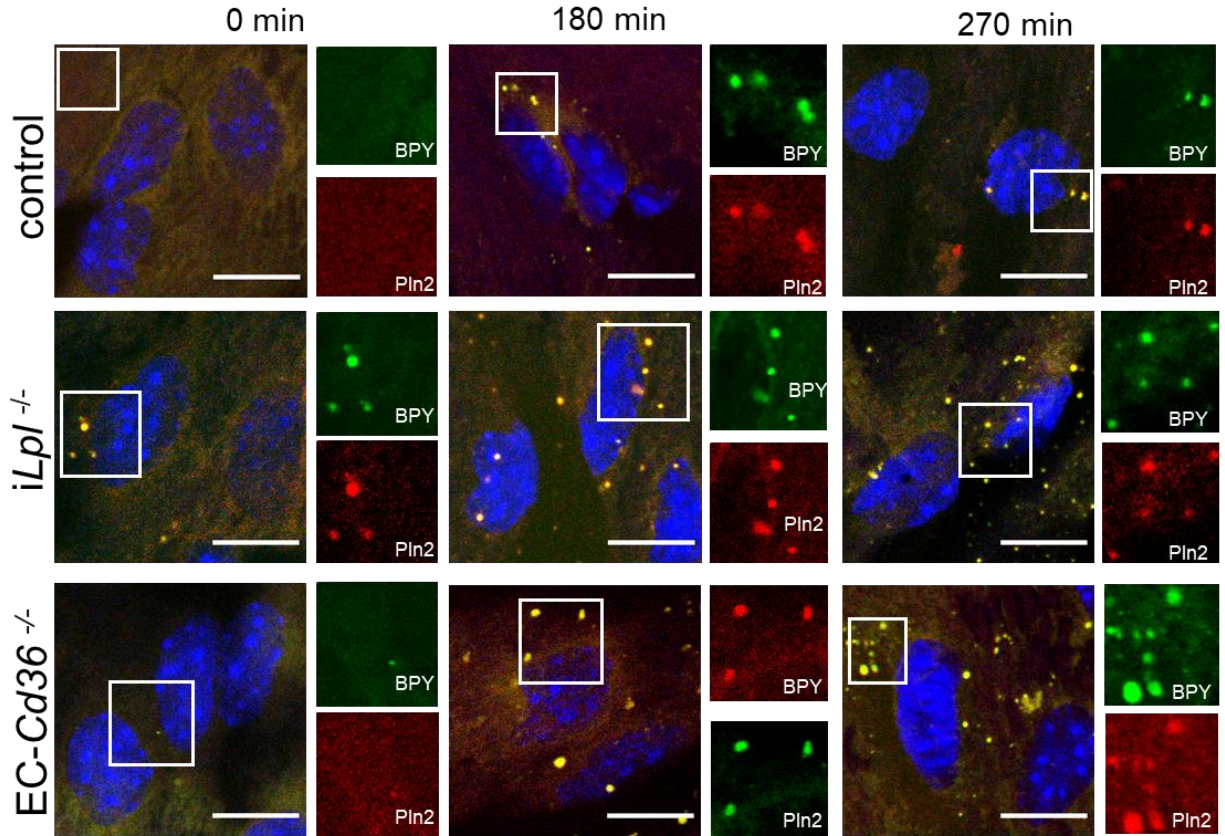

**Supplementary Figure 1.** 3-4 month old male control, *iLpl*<sup>-/-</sup> and *EC-Cd36*<sup>-/-</sup> mice were fasted for 16 hours and given olive oil by oral gavage (10ml/kg). At the indicated times, mice were sacrificed and their thoracic aortae were stained with BODIPY 493/503 (green) to label neutral lipids and immunostained for lipid droplet coat protein Perilipin 2 (Pln2, red). Co-localization of BODIPY 493/503 and Perilipin 2 in lipid droplets is shown in yellow. Scale bars = 10 μm. Additional inset magnification: x1.5 (top panels), x2 (middle and bottom panels).

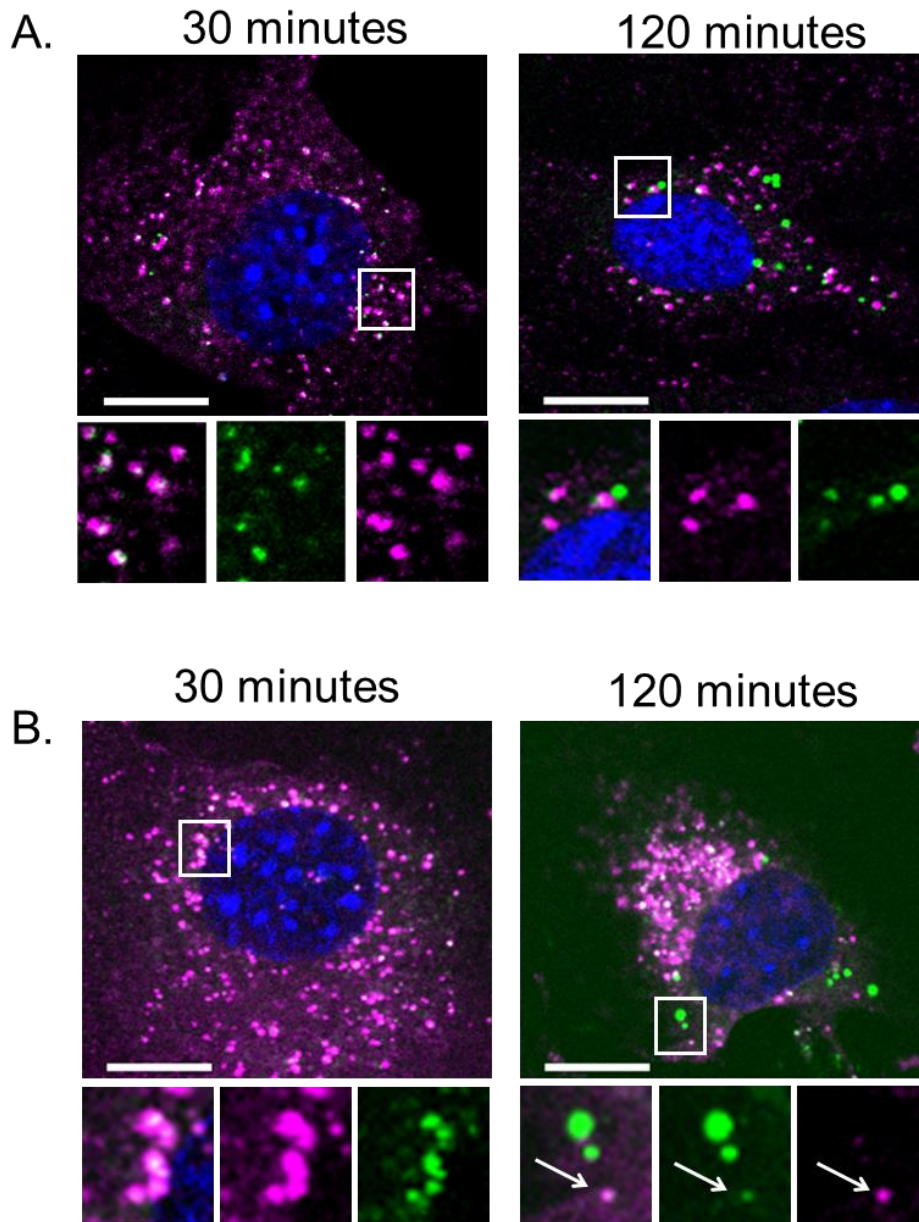

**Supplementary Figure 2. ECs internalize chylomicrons from *iLpl*<sup>-/-</sup> mice and *LpL*-deficient humans:** MECs were deprived of serum overnight and exposed to chylomicrons (4mg/dL TG) obtained from olive oil-gavaged *iLpl*<sup>-/-</sup> mice (A) or the plasma of an *LpL*-deficient patient (B) for 30 or 120 minutes. At 30 minute incubations, intracellular BODIPY493/503 puncta (green) fully co-localized with ApoB (magenta) (A and B, left panels). Co-localization at 120 minutes was partial, with only small BODIPY493/503 puncta co-localizing with ApoB (A and B, right panels). Scale bars = 10  $\mu$ m. Additional inset magnification: x2.

A.

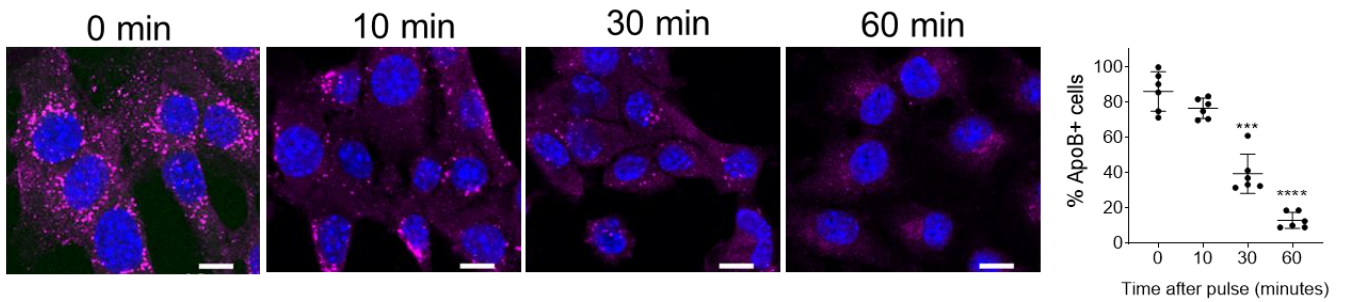

B.

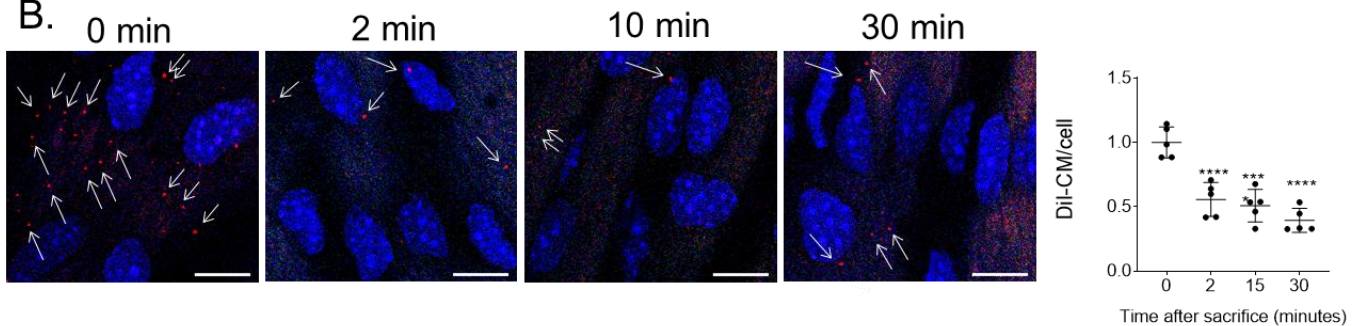

**Supplementary Figure 3. Intracellular chylomicron degradation in cultured MECs and aortic ECS.**

(A) Cultured mouse ECs were deprived of serum overnight and exposed to human chylomicrons (4mg/dl in FBS-free medium) After a 30 minute pulse, cells were either fixed (0 min) or maintained in FBS-free medium for 10-60 minutes. The percentage of ApoB-positive cells at each time point is quantified in the graph (right panel). After a 30-minute pulse with chylomicrons, ≈ 80% cells exhibited intracellular ApoB puncta. When samples were switched to FBS-free medium, intracellular ApoB signal was gradually lost over time. Data represent the mean ± SD of 6 independent experiments. All comparisons are to 0 min after pulse. \*\*\*p<0.001, \*\*\*\*p<0.0001 (one-way ANOVA). (B) Dil-labeled chylomicrons (Dil-CM, red) were administered retro-orbitally to wild type mice (5 per group). Aortas were harvested 15 minutes post injection and either fixed (0 min) or maintained in FBS-free medium for 2-30 minutes. The number of Dil-labeled chylomicrons within aortic ECs rapidly declined over time, with a 50% reduction happening within 2 minutes (B, quantified in right panel). All comparisons are to 0 minutes. \*\*\*\*p<0.0001 (one-way ANOVA). White arrows indicate Dil-chylomicrons, Scale bars = 10 μm.

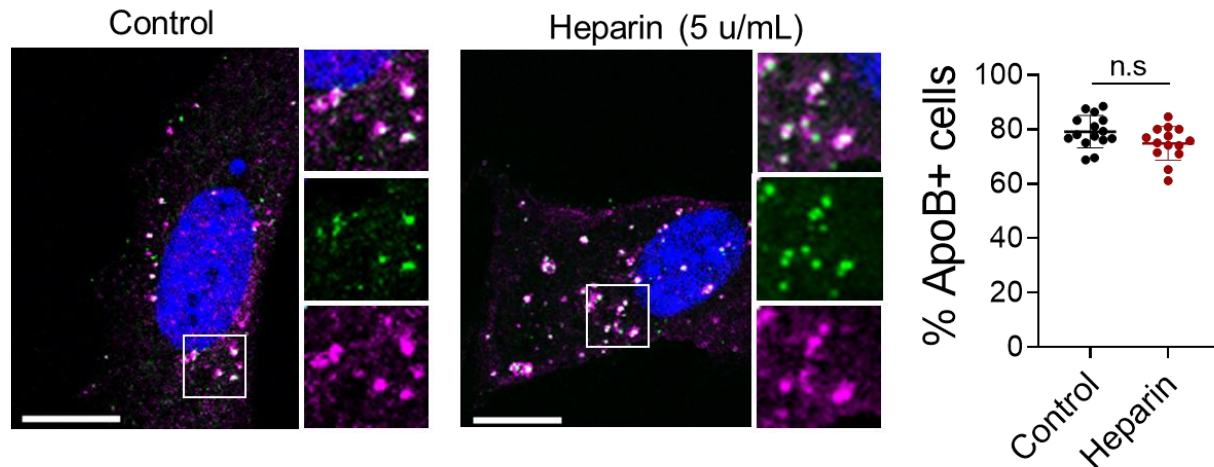

**Supplementary Figure 4. Treatment with heparin to disrupt proteoglycan binding does not preclude EC chylomicron internalization.** Cultured MECs were deprived of serum overnight and either left untreated (control) or pre-treated with 5 units/mL heparin for 1 hour. Cells were then exposed to a chylomicron pulse for 30 minutes (4 mg/dL TG), and internalized chylomicrons were assessed by the presence of ApoB /BODIPY 493/503-positive puncta. Treatment with heparin did not disrupt chylomicron internalization by MECs (quantification is shown in graph, right panel). Scale bars = 10  $\mu$ m. Additional inset magnification: x2.

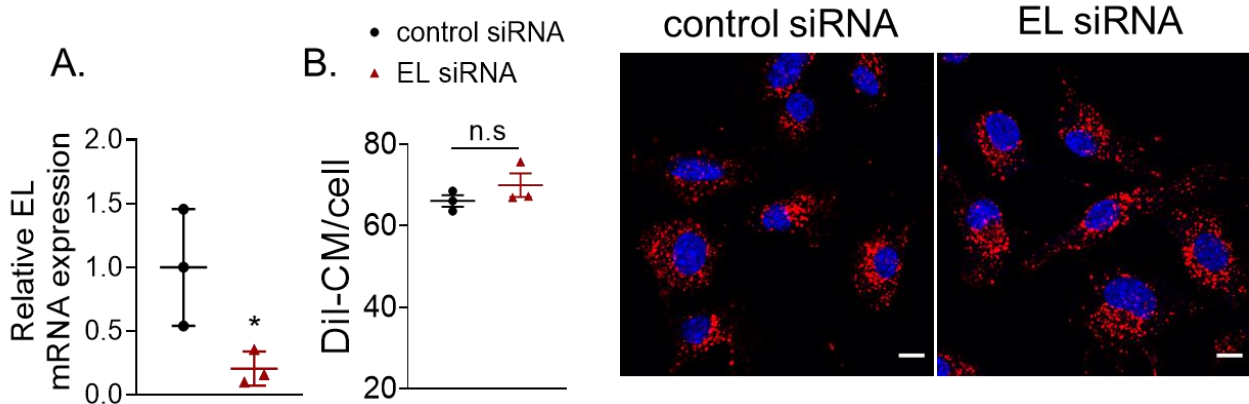

**Supplementary Figure 5. Inhibition of endothelial lipase (EL) with siRNA does not preclude uptake of Dil-labeled chylomicrons by ECs.** Cultured MECs were treated with control siRNA or siRNA against EL, deprived of serum overnight, and incubated with Dil-labeled chylomicrons (4mg/dL TG in FBS-free medium). EL siRNA significantly inhibited the expression of the lipase, as monitored by qRT-PCR (A), but had no significant defect on the uptake of Dil-labeled chylomicrons (B). Data represents the mean  $\pm$  SD of 3 independent experiments. \* $p < 0.05$  (Student's t test). Scale bars = 10  $\mu$ m.

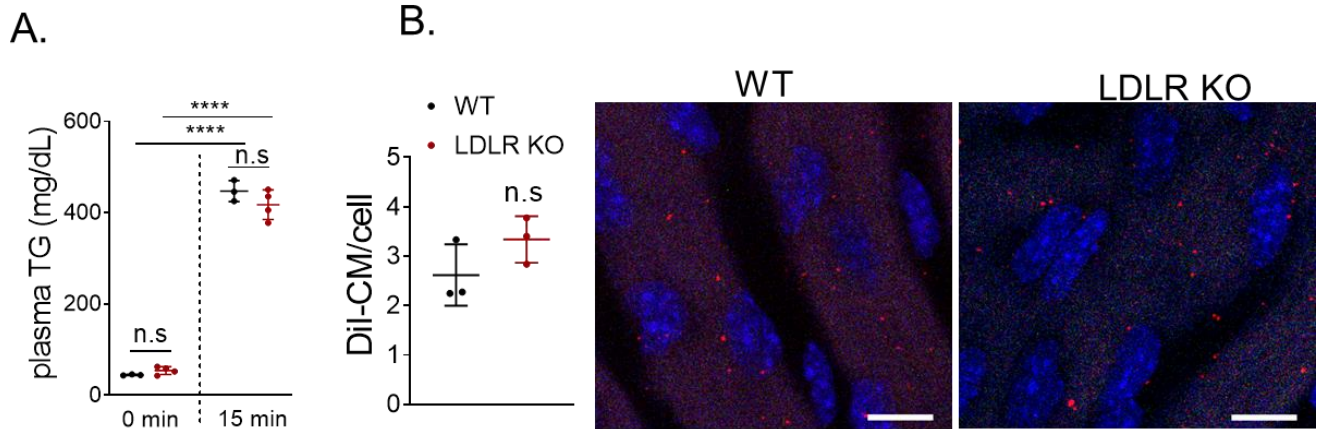

**Supplementary Figure 6. Uptake of Dil-labeled chylomicrons by aortic ECs is not inhibited in LDLR-deficient mice.** WT and LDLR KO mice (3-4 month old males) were fasted overnight, and Dil-chylomicrons (0.5 mg/g TG) were administered retro-orbitally. 15 minutes after Dil-chylomicron injection, mice were sacrificed and their thoracic aortas were harvested for confocal microscopy visualization of Dil-chylomicrons within aortic ECs. (A) Both WT and LDLR KO mice exhibited a significant increase in plasma TG levels 15 minutes after intravenous Dil-chylomicron administration. (B) LDLR deficiency did not decrease the number of Dil-chylomicrons (red) visible within aortic ECs. Data represent the mean ± SD of 3 independent experiments. \*\*\*\*p < 0.00001 (one-way Anova, Tukey's multiple comparisons test). Scale bars = 10 μm.

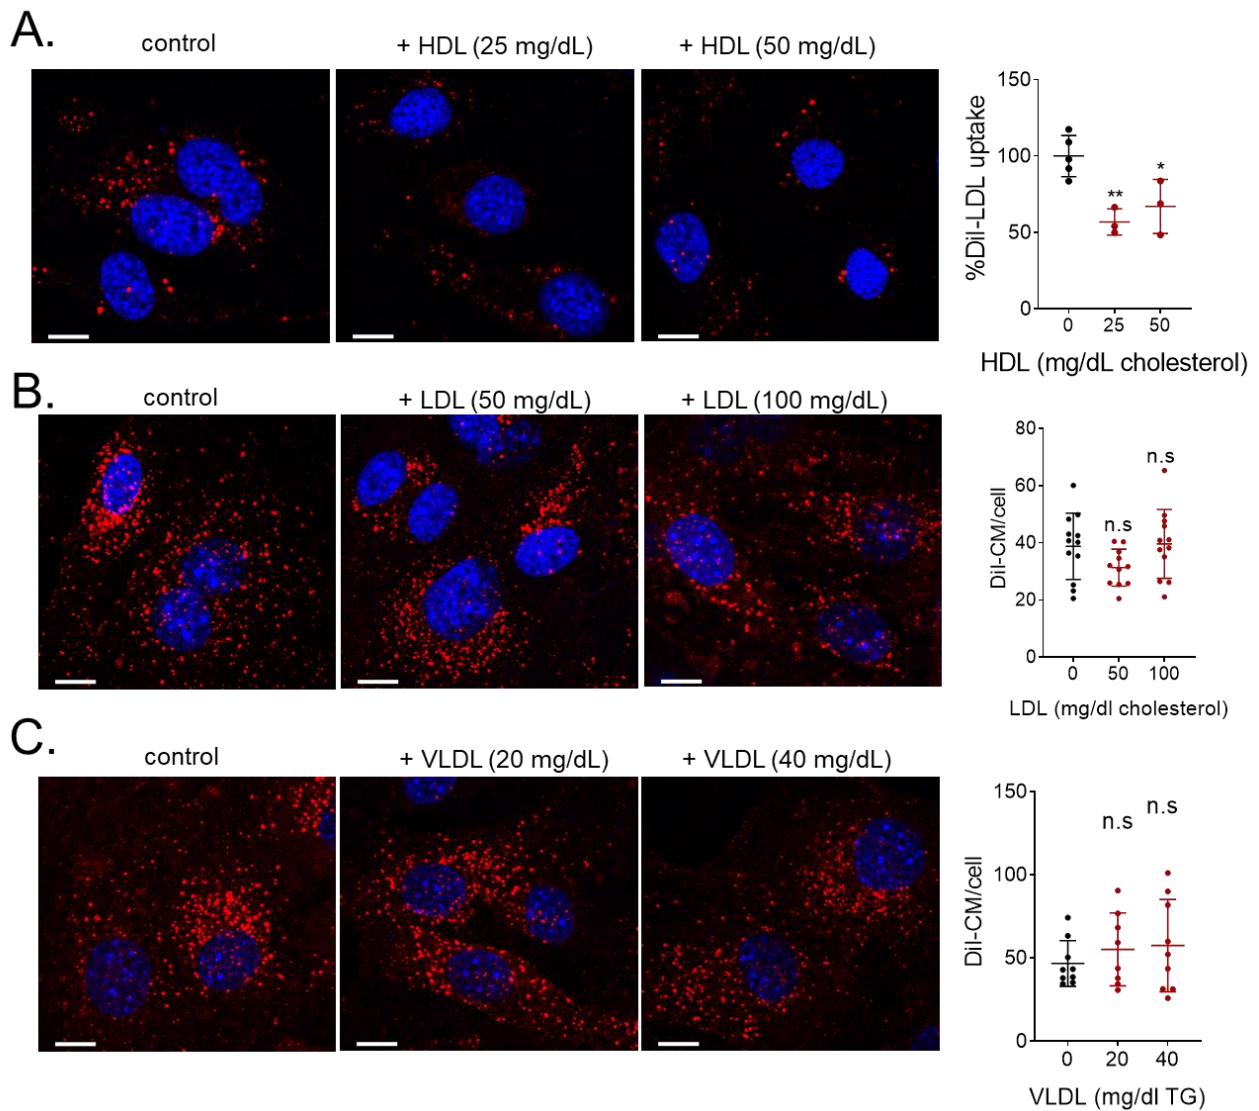

**Supplementary Figure 7. Competition studies.** (A) Dil-labeled LDL uptake by cultured MECs is inhibited by co-incubation with unlabeled HDL. MECs were deprived of serum overnight, then pulsed with Dil-labeled LDL (Dil-LDL, red) in the absence (control) or presence of the indicated concentrations of unlabeled HDL. The number of Dil-LDL particles per cell is quantified in the graph (right panel). Data represent mean  $\pm$  SD of 3 independent experiments. All comparisons are to control. \* $p < 0.05$ , \*\* $p < 0.01$  (one-way Anova, Dunnett's multiple comparisons test). (B, C) MECs were deprived of serum overnight, then pulsed with Dil-labeled chylomicrons (Dil-CM, red) for 30 minutes and in the absence (control) or presence of the indicated concentrations of unlabeled LDL (B) or VLDL (C). The number of Dil-CM per cell is quantified in the graphs (right panels). Co-incubation with LDL or VLDL did not affect Dil-CM uptake in cultured MECs. Data represent mean  $\pm$  SD of 6-8 independent experiments. All comparisons are to control (one-way Anova, Dunnett's multiple comparisons test). Scale bars = 10  $\mu$ m.

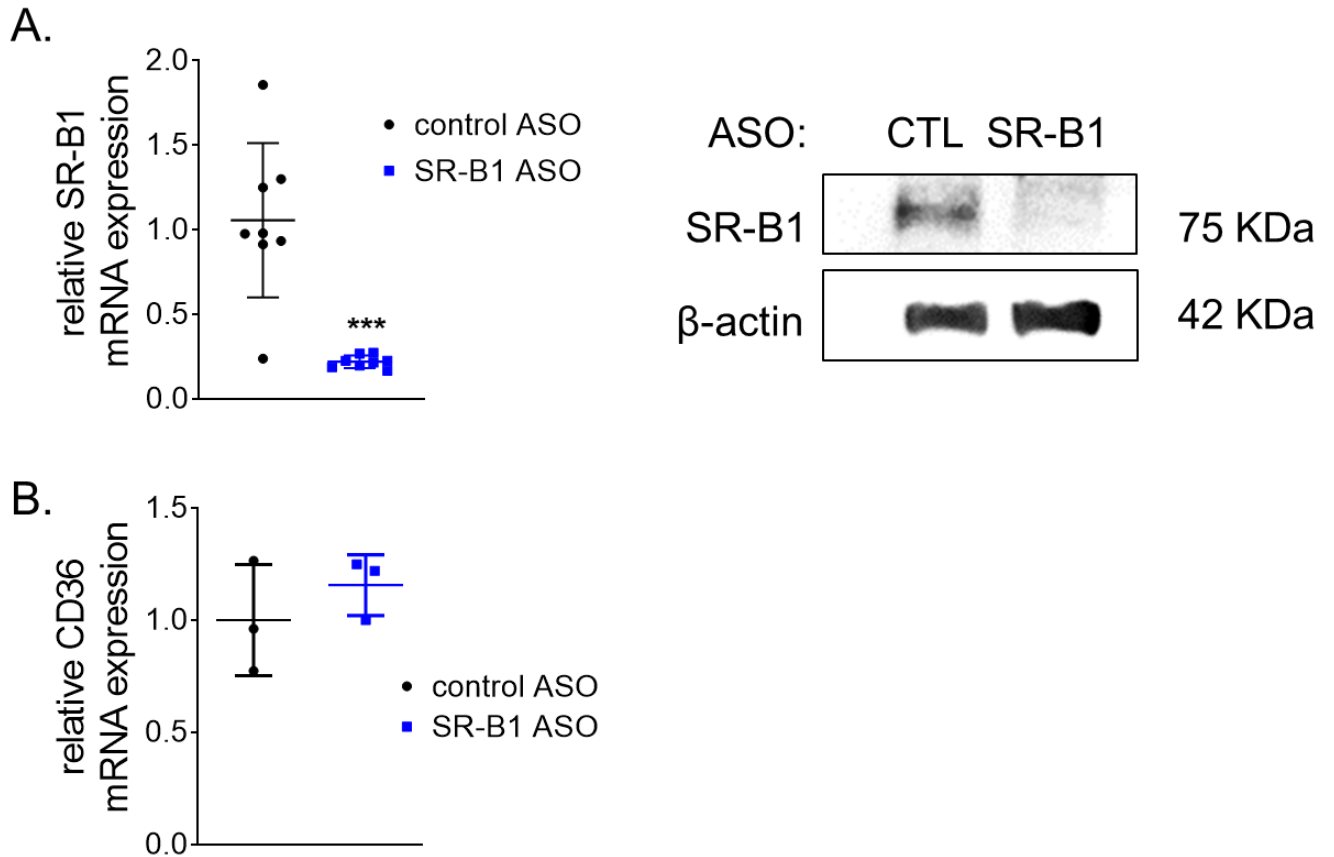

**Supplementary Figure 8. Knockdown of SR-B1 with antisense oligonucleotides (ASO).** (A) Cultured MECs were treated with control ASO or ASO against SR-B1. SR-B1 ASO significantly reduced SR-B1 mRNA expression (left panel). SR-B1 knockdown was also apparent at the protein level, as assessed by immunoblotting (right panel, \*unspecific band). Data represent mean  $\pm$  SD of 4 independent experiments. \*\*\* $p < 0.001$  (Student's t test). (B) Wild type mice (6 per group) were injected with either control or SR-B1 ASO (100 mg/kg) once a week for 3 weeks. 72 hours after the last injection, livers were harvested and CD36 expression was monitored by RT PCR. Despite their close molecular similarity, SR-B1 ASO did not reduce CD36 mRNA expression. Data represent mean  $\pm$  SD (Student's t test).



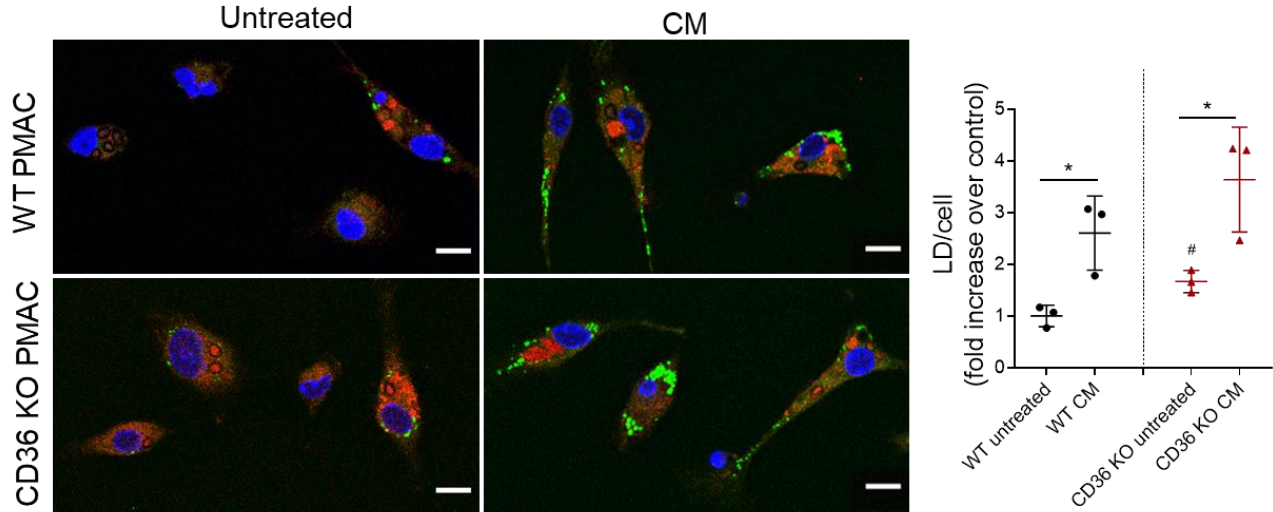

**Supplementary Figure 9.** MECs were grown to confluency in transwell inserts and deprived of FBS for 24h. On the day of the experiment, MECs were either left untreated (control) or exposed to a 30-minute pulse with chylomicrons, thoroughly washed, and switched to fresh FBS-free medium. Inserts were then immediately placed into wells containing freshly harvested primary peritoneal macrophages (PMAC) obtained from wt or CD36 KO mice and co-cultured for 4h. PMACs were immunostained for macrophage marker CD68 (red), and LDs were labeled with BODIPY493/503 (green). PMAC from both wt and CD36 KO mice exhibited a significant increase in lipid droplet content when co-cultured with chylomicron-pulsed MECs as compared to control MECs maintained in FBS-free media. Data represent mean  $\pm$  SD of 3 independent experiments. \* $p < 0.05$  (Student's t test). Scale bars = 10  $\mu$ m.

## Supplementary Table 1

### MATERIALS

| REAGENT or RESOURCE                                                                | SOURCE                                                                                                                                          | IDENTIFIER       |
|------------------------------------------------------------------------------------|-------------------------------------------------------------------------------------------------------------------------------------------------|------------------|
| <b>Antibodies</b>                                                                  |                                                                                                                                                 |                  |
| Goat polyclonal to Apolipoprotein B                                                | Abcam                                                                                                                                           | ab7616           |
| Rabbit Polyclonal to Perilipin-2/ADFP antibody                                     | Novus Biologicals                                                                                                                               | NB110-40877      |
| Rabbit Polyclonal to SR-B1 antibody                                                | Novus Biologicals                                                                                                                               | NB400-104        |
| Rabbit Polyclonal to VE Cadherin                                                   | Abcam                                                                                                                                           | ab33168          |
| Goat Anti-Rabbit IgG H&L (Alexa Fluor® 568)                                        | Abcam                                                                                                                                           | ab175471         |
| Goat Anti-Rabbit IgG H&L (Alexa Fluor® 488)                                        | Abcam                                                                                                                                           | ab150077         |
| Donkey anti-Goat IgG (H+L) Cross-Adsorbed Secondary Antibody, Alexa Fluor 633      | Invitrogen                                                                                                                                      | A-21082          |
| <b>Peptides, siRNA and ASO</b>                                                     |                                                                                                                                                 |                  |
| SR-B1 ASO (GCTTCAGTCATGACTTCCTT)                                                   | Ionis Pharmaceuticals, Inc.<br>Courtesy of Dr M. Mahmood Hussain (NYU Winthrop, Long Island), obtained as described (1).                        | ISIS No: 353382  |
| Human Recombinant ApoB18 peptide                                                   |                                                                                                                                                 | N/A              |
| ALK1 siRNA                                                                         | Dharmacon                                                                                                                                       | D-005302-06      |
| <b>Primary cells and cell lines</b>                                                |                                                                                                                                                 |                  |
| Mouse cardiac microvascular endothelial cells                                      | Angiocrine Bioscience<br>Yale University Vascular Biology and Therapeutics (VBT) Core facility<br>Obtained from Zymogen-treated WT C57BL/6 mice | mVera-hrt-01     |
| Human umbilical vein endothelial cells (HUVEC)                                     |                                                                                                                                                 | N/A              |
| Mouse primary peritoneal macrophages (PMAC)                                        |                                                                                                                                                 | N/A              |
| <b>Animal models</b>                                                               |                                                                                                                                                 |                  |
| Mouse: C57BL/6J                                                                    | Jackson Laboratory<br>Generated in Ira Goldberg's lab as described (2).                                                                         | Stock No: 000664 |
| Mouse: <i>Lp<sup>fl/fl</sup></i> and <i>iLp<sup>-/-</sup></i>                      | Generated in Ira Goldberg's lab as described (3).                                                                                               | N/A              |
| Mouse: <i>Cd36<sup>fl/fl</sup></i> and <i>EC-Cd36<sup>-/-</sup></i>                |                                                                                                                                                 | N/A              |
| <b>Tissue culture media and supplements</b>                                        |                                                                                                                                                 |                  |
| Advanced DMEM/F-12 (Dulbecco's Modified Eagle Medium/Ham's F-12)                   | ThermoFisher Scientific                                                                                                                         | 12634028         |
| Endothelial Cell Growth supplement, bovine hypothalamus, BT-203                    | ThermoFisher Scientific (Alfa Aesar)                                                                                                            | J64516-MF        |
| Recombinant Murine VEGF 165                                                        | ThermoFisher Scientific (Peprotech)                                                                                                             | 50-162-6093      |
| Recombinant Human FGF-basic (154 a.a.)                                             | ThermoFisher Scientific (Peprotech)                                                                                                             | 50-398-430       |
| GlutaMAX™ Supplement                                                               | Gibco                                                                                                                                           | 35050061         |
| SB 431542 (4-[4-(1,3-benzodioxol-5-yl)-5-(2-pyridinyl)-1H-imidazol-2-yl]benzamide) | Tocris                                                                                                                                          | 16-141-0         |
| Gibco™ HEPES (1M)                                                                  | Gibco                                                                                                                                           | 15-630-106       |
| Heparin sodium salt from porcine intestinal mucosa                                 | Sigma-Aldrich                                                                                                                                   | H3149-50KU       |
| Fetal Bovine Serum                                                                 | Life Technologies                                                                                                                               | 10437028         |
| Antibiotic-Antimycotic (100X)                                                      | Life Technologies                                                                                                                               | 15240-062        |

RPMI 1640, 1x with L glutamine

|                                                                                                 | Corning                 | 10-040-CV   |
|-------------------------------------------------------------------------------------------------|-------------------------|-------------|
| <b>Commercial lipoproteins, lipid dyes, and lipid quantification reagents</b>                   |                         |             |
| Chylomicrons (ULDL) from Human Plasma                                                           | Lee Biosolutions        | 194-14-0.1  |
| Low Density Lipoprotein from Human Plasma, Dil complex (Dil LDL)                                | Invitrogen              | L3482       |
| High Density Lipoprotein (HDL)                                                                  | Lee Biosolutions        | 361-25-1    |
| Very Low Density Lipoprotein (VLDL)                                                             | Lee Biosolutions        | 361-10-0.01 |
| BODIPY™ 493/503                                                                                 | Invitrogen              | D3922       |
| Dil Stain (1,1'-Dioctadecyl-3,3',3'-Tetramethylindocarbocyanine Perchlorate ('Dil'; DilC18(3))) | Invitrogen              | D282        |
| Infinity Triglyceride Reagent                                                                   | ThermoFisher Scientific | TR22421     |
| NEFA HR (2) Color Reagent A                                                                     |                         | NC9517308   |
| NEFA HR (2) Solvent A                                                                           |                         | NC9517309   |
| NEFA HR (2) Color Reagent B                                                                     | Wako Diagnostics        | NC9517310   |
| NEFA HR (2) Solvent B                                                                           |                         | NC9517311   |
| <b>Enzymes and pharmacological inhibitors</b>                                                   |                         |             |
| Lipoprotein Lipase (LpL) from Bovine Milk                                                       | Sigma-Aldrich           | L2254-1KU   |
| Heparin sodium salt from porcine intestinal mucosa                                              | Sigma-Aldrich           | H3149-50KU  |
| Atglistatin                                                                                     | Sigma-Aldrich           | SML1075     |
| Bafilomycin A1                                                                                  | Sigma-Aldrich           | 19-148      |
| Dynasore hydrate                                                                                | Sigma-Aldrich           | D7693       |

## Supplementary references

1. Bakillah, A., Jamil, H. & Hussain, M. M. Lysine and arginine residues in the N-terminal 18% of apolipoprotein B are critical for its binding to microsomal triglyceride transfer protein. *Biochemistry* 37, 3727–3734 (1998).
2. Noh, H.-L., Okajima, K., Molkenin, J. D., Homma, S. & Goldberg, I. J. Acute lipoprotein lipase deletion in adult mice leads to dyslipidemia and cardiac dysfunction. *Am. J. Physiol. Endocrinol. Metab.* 291, E755-60 (2006).
3. Son, N. H. et al. Endothelial cell CD36 optimizes tissue fatty acid uptake. *J. Clin. Invest.* 128, 4329–4342 (2018).
